## **Title: Asexual reproduction drives the reduction of transposable element load**

**Authors:** Jens Bast<sup>1\*,†</sup>, Kamil S. Jaron<sup>1,2,†</sup>, Donovan Schuseil<sup>1</sup>, Denis Roze<sup>3,4</sup>, Tanja Schwander<sup>1</sup>

### **Affiliations:**

5 <sup>1</sup>Department of Ecology and Evolution, University of Lausanne, Lausanne, Switzerland

<sup>2</sup>Swiss Institute of Bioinformatics, Lausanne, Switzerland

<sup>3</sup>Centre National de la Recherche Scientifique (CNRS), UMI 3614, Roscoff, 29688 France

<sup>4</sup>Sorbonne Université, Station Biologique de Roscoff, 29688 France

10 †authors contributed equally

\*Correspondence to: [mail@jensbast.com](mailto:mail@jensbast.com)

### **Abstract:**

Theory predicts that sexual reproduction can both facilitate and restrain transposable element  
15 (TE) accumulation by providing TEs with a means of spreading to all individuals in a population  
and facilitating TE load reduction via purifying selection. By quantifying genomic TE loads over  
time in experimental sexual and asexual *Saccharomyces cerevisiae* populations, we provide  
direct evidence that asexual reproduction drives a reduction of TE loads. We show, using  
simulations, that this reduction occurs via evolution of TE activity, most likely via increased  
20 excision rates. Thus, sex is a major driver of genomic TE loads and at the root of the success of  
TEs.

25

30

### **Main Text:**

Self-replicating transposable elements (TEs) can occupy large fractions of genomes in organisms throughout the tree of life (reviewed in Hua-Van et al., 2011). Their overwhelming success is driven by their ability to proliferate independently of the host cell cycle via different self-copying mechanisms (i.e., in a ‘cut-and-paste’ or ‘copy-and-paste’ style). These mechanisms allow TEs to invade genomes similarly to parasites despite generally not providing any advantage to the individual carrying them (Doolittle and Sapienza, 1980; Orgel and Crick, 1980). To the contrary, TEs generate deleterious effects in their hosts by promoting ectopic recombination and because most new TE insertions in coding or regulatory sequences disrupt gene functions (Finnegan, 1992; Montgomery et al., 1991).

Theory predicts that sexual reproduction can both facilitate and restrain the genomic accumulation of TEs and it is currently unclear whether the expected net effect of sex on TE loads is positive or negative. Sexual reproduction can facilitate the accumulation of TEs because it allows TEs to colonize new genomes and spread throughout populations (Hickey, 1982; Zeyl et al., 1996). Because the colonization of new genomes is more likely for active TEs, sexual reproduction should favor the evolution of highly active TEs (Charlesworth and Langley, 1986; Hickey, 1982), even though increased activity generates higher TE loads and additional deleterious effects in the host genome. At the same time, sexual reproduction can restrain TE accumulation because it facilitates the evolution of host defences and increases purifying selection against deleterious TE copies (Agren and Wright, 2011; Arkhipova and Meselson, 2005; Crespi and Schwander, 2012; Nuzhdin and Petrov, 2003; Wright and Finnegan, 2001). In the absence of sex, reduced purifying selection can thus result in the accumulation of TEs, unless TE copies get eliminated via excision at sufficiently high rates (Dolgin and Charlesworth, 2006).

To quantify whether the net effect of sexual reproduction on genomic TE loads is positive or negative, we study the evolution of genomic TE loads in experimental yeast (*Saccharomyces cerevisiae*) populations generated in a previous study (McDonald et al., 2016). In McDonald et al., four sexual and four asexual strains originating from the same ancestor strain (W303) were maintained under constant conditions. For sexual strains, a mating event was induced every 90

generations. Sequencing of each strain was conducted at generation 0 and every 90 generations  
60 prior to mating (for details see **Methods**, and McDonald et al., 2016). In the present study, we  
use the published Illumina data to quantify TE loads in each strain for each sequenced  
generation.

TEs in *S. cerevisiae* are well characterized (Carr et al., 2012; Castanera et al., 2016; Voytas and  
Boeke, 1992). *S. cerevisiae* TEs consist solely of ‘copy-and-paste’ elements that are flanked by  
65 long terminal repeats (LTRs) and are grouped into the families *Ty1-Ty5* (Voytas and Boeke,  
1992). The 12.2 Mb genome of the studied yeast strain comprises approximately 50 full-length,  
active *Ty* element copies, and 430 inactive ones (Carr et al., 2012). Inactive copies comprise  
truncated elements as well as remnants from TE excisions, which consist of a single LTR (Carr et  
al., 2012). Excisions are driven by intra-chromosomal recombination between the two flanking  
70 LTRs of a TE.

Using different computational approaches to quantify genomic TE loads in experimental yeast  
strains, we show that sex is required for the success of TEs, as TE loads decrease over time under  
asexual reproduction. For the first approach, we quantified total TE loads, without distinguishing  
between active and inactive TEs. This was done by computing the fraction of reads that mapped  
75 to a curated *S. cerevisiae* TE library (see **Methods**) for each yeast strain and sequenced  
generation. This analysis revealed that the total TE load in sexual strains remained constant over  
1000 generations, but decreased in asexual strains over time (resulting in a total reduction of  
23.5% after 1000 generations; generation effect  $P < 0.001$ , reproductive mode effect  $P = 0.081$ ,  
and interaction between generation and mode  $P < 0.001$ ; permutation ANOVA, **Fig. S1**). For the  
80 second approach, we focused on active (i.e., full-length) TE copy insertions, because only active  
TEs can increase genomic TE loads over time. Detecting specific TE insertions by aligning  
short-read data to a reference genome is difficult and associated with a detection bias towards  
TEs present in the reference genome. With a pipeline that combines different complementary  
approaches (see **Methods**), the available sequencing data allowed us to detect 24 out of the 50  
85 full-length insertions present in the reference genome. As with the first approach, we found that  
the number of (detectable) full-length TE copies remained constant in sexual yeast strains, but  
decreased in asexual strains over time (generation effect  $P = 0.006$ , reproductive mode effect  $P =$

0.033, and interaction between generation and mode  $P < 0.001$ ; permutation ANOVA). In asexual strains, the estimated average number of full-length TEs decreased from approximately 50 to 41 over 1000 generations (Fig. 1).

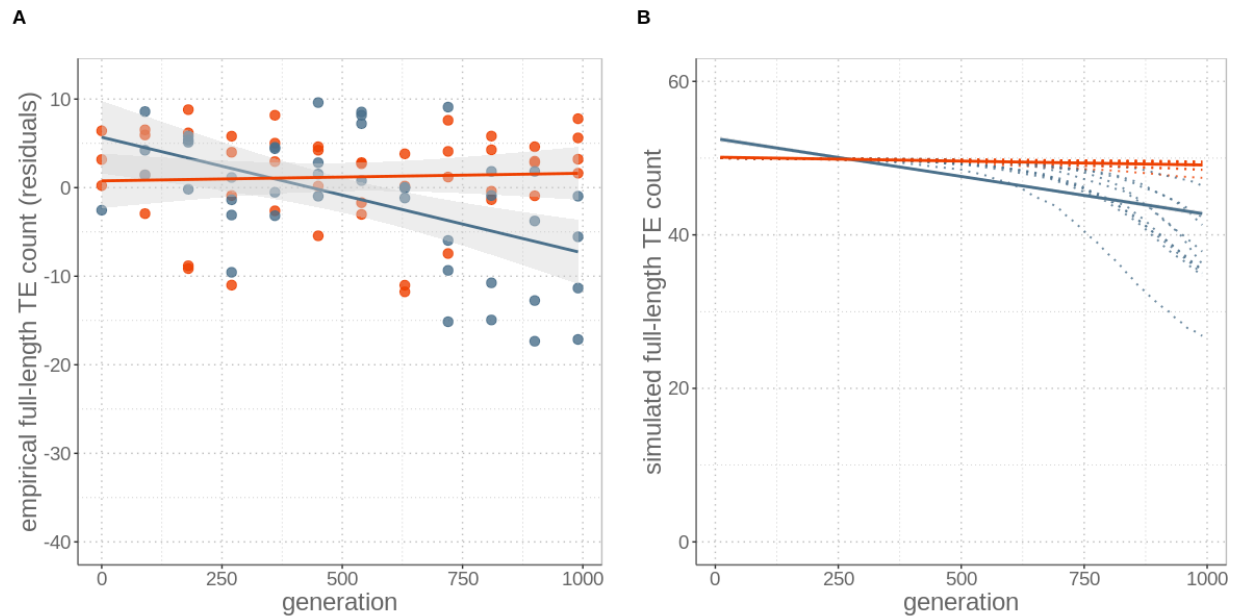

**Fig. 1.** Sex maintains constant TE loads through time, while its absence drives TE copy number reductions, for both (A) empirical data and (B) simulations including a modifier allele. (A) Number of full-length TE copies inserted in genomes for four replicates of sexual (red) and asexual (blue) yeast strains over 1000 generations of experimental evolution. Numbers are expressed as residuals, since the TE detection probability depends on sequencing coverage (Fig. S2). (B) Individual-based simulations to study expected TE load dynamics under sexual and asexual reproduction with ten replicates (dotted lines). The simulations are parameterized with yeast-specific values and include an allele modifying TE activity rates. For both (A) empirical and (B) simulation data, asexuals lost about nine active, full-length TEs by generation 1000. Lines represent LR and the grey areas represent 95% CI.

This decrease could be generated by increased TE excision rates in asexual as compared to sexual yeast, reduced transposition rates, or a combination of both mechanisms. To evaluate the relative importance of the two mechanisms, we estimated the number losses of TEs present in the ancestral yeast strain, as well as the number of novel insertions, at each generation (Fig. 2). These analyses revealed that ‘ancestral’ TE insertions are lost at a higher rate in asexual than

sexual strains (generation effect  $P = 0.002$ , reproductive mode effect  $P = 0.027$ , and interaction  
110 between generation and mode  $P < 0.001$ ; permutation ANOVA), while we detected similar  
numbers of novel TE insertions (indicative of similar transposition rates) for the two  
reproductive modes (generation effect  $P = 0.338$ , reproductive mode effect  $P = 0.271$ , and  
interaction between generation and mode  $P = 0.599$ ; permutation ANOVA). Taken together, our  
empirical observations indicate that even very rare events of sex (here just 10 out of 990 events  
115 of reproduction) are sufficient to maintain genomic TE loads, while asexuality results in the  
reduction of TE loads, most likely via the evolution of increased TE excision rates.

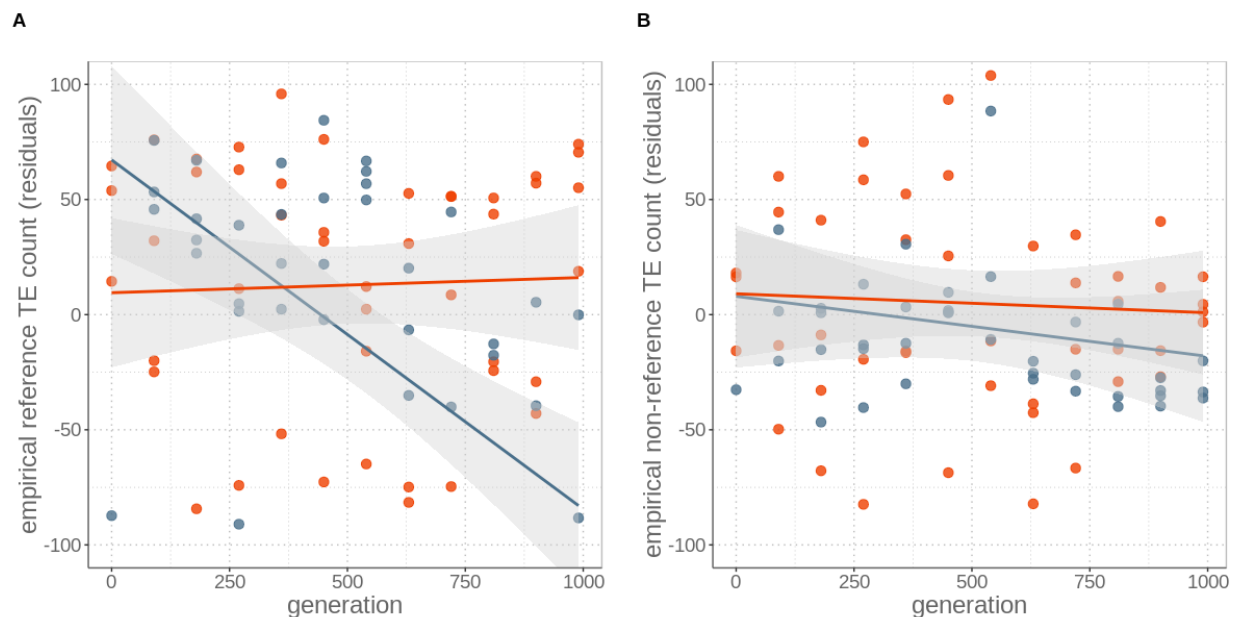

**Fig. 2.** Decrease of insertions in asexuals over time is largely driven by loss of ‘ancestral’  
120 reference insertions (A) rather than novel insertions (B). Count of any TE insertions, irrespective  
of full-length TE, solo LTR, truncated elements or other types. Numbers are expressed as  
residuals, since TE detection probability depends on sequencing coverage. Lines represent LR  
and the grey areas represent 95% CI.

125 Our empirical findings suggest that the evolution of reduced TE activity in asexual strains  
influences genomic TE loads more strongly than purifying selection, which should act to reduce  
TE loads most effectively in sexual strains. To evaluate the robustness of these findings, we

tested whether the net loss of TEs under asexuality could be recapitulated via a theoretical approach. As explained above, different theoretical approaches have shown that both purifying selection and activity rate evolution can affect TE loads under sexual or asexual reproduction (Charlesworth and Langley, 1986; Dolgin and Charlesworth, 2006; Hickey, 1982). However, there is currently no theoretical framework that studies TE load evolution under the joint effects of the different processes. To fill this gap, we extended the individual-level simulation program of Dolgin and Charlesworth (Dolgin and Charlesworth, 2006). This program allows to study the evolution of TE copy numbers in an asexual lineage as a function of TE activity (the joint effects of transposition and excision rates), as well as of the strength of selection against TE insertions, which depends on the fitness cost per TE insertion. To compare TE loads in sexual and asexual lineages, we first extended the program to include events of sexual reproduction and parameterized the simulations with empirically determined values from yeast (Blanc and Adams, 2004; Carr et al., 2012; Garfinkel et al., 2005; see **Supplementary Material**). We thus ran individual-based simulations with a range of transposition rates, excision rates and selection coefficients with and without epistasis between TE copies as pertinent for yeast (see **Table S2**). For all simulations, TE loads in populations undergoing sex every 90 generations decreased faster than in asexual populations, contrary to our empirical observations. This faster decrease of TE loads in sexual populations occurred because sexual events generated variation among individuals in TE loads (i.e., fitness), which facilitates selection against deleterious TEs (see also Dolgin and Charlesworth, 2006). Implementing different transposition rates under meiosis (sex) or mitosis (asex) did not affect this finding. Indeed, increased TE activity during meiosis only transiently increases TE loads in sexual strains. Because such activity also generates increased variation in TE loads (and therefore fitness) among strains, the additional TE copies generated during meiosis are rapidly removed by purifying selection (**Fig. S4**). In a second step, we therefore allowed for the evolution TE activity rates over time. This was implemented by introducing a modifier allele that increases excision rates. The allele itself has no direct fitness effect, such that it can only be fixed in a population via genetic hitchhiking. In simulations including the modifier allele, the modifier spreads rapidly to fixation in asexual strains, because it is associated with genomes that have fewer TE copies and therefore a higher relative fitness.

As a consequence, TE activity rates decrease in asexual populations (**Fig. S3**). By contrast, the modifier cannot spread as rapidly in sexual populations because recombination constantly breaks up the association between the modifier and less TE loaded backgrounds. By allowing for the evolution of TE activity rates in our simulations, we were able to identify parameter values representative for yeast that result in simulations with a very close fit to our empirical results (**Fig. 1B, Table S3**). These analyses thus corroborate our empirical findings that a likely mechanism driving genomic TE load reduction in asexual yeast strains is the rapid evolution of increased TE excision rates. A similar effect would be expected if our modifier acted on transposition rather than excision rates, since the net TE activity depends on the relative rates of transposition vs excision. However, our empirical results do not suggest major differences in transposition rates between sexual and asexual yeast strains. In combination with our findings that in the absence of TE activity evolution, sexual strains always lose TEs faster than asexual ones, the empirical results are best explained by an increase in TE excision rates under asexuality (**Fig. 1, 2**).

Our study conclusively shows that sexual reproduction drives the maintenance of TE load in *S. cerevisiae*, while in its absence, TE loads decrease, likely via the evolution of TE activity rates. These findings are consistent with the idea that TEs should evolve to be benign in asexual species, because the evolutionary interests of TEs and their host genome are aligned (Charlesworth and Langley, 1986). While the exact mechanisms causing TE activity change in the asexual yeast populations cannot be assessed in the empirical data, our simulations suggest that there is some form of TE defense mechanism (a ‘modifier locus’) that either segregates in the ancestral yeast strain used in the experiments or repeatedly appeared *de novo* during experimental evolution. Independently of the exact mechanism underlying TE activity evolution in asexual populations, we show that TE loads do not increase, but decrease, in asexual populations. This contrasts with the hypothesis that most asexual species are evolutionarily short lived because they are driven to extinction via negative consequences of accumulating TE copies (Arkhipova and Meselson, 2005; Nuzhdin and Petrov, 2003). Instead, sex, which is the main form of reproduction in eukaryotes, is at the root of the evolutionary success of parasitic TEs.

## Methods

### Yeast experimental evolution

We used data generated in a previous study based on experimental evolution of the yeast *S. cerevisiae* (for in-depth details see (McDonald et al., 2016)). In short, 12 different strains were initiated from the same pool of ancestral strains (derived from haploid W303 strains) and kept under constant conditions. Sexual reproduction in yeast depends on the presence of two separate mating types. Only individuals with different mating types can fuse and go through meiosis. Asexual reproduction occurs through budding. For the experiment, six strains consisting of mating type a (MATa) and six of mating type  $\alpha$  (MAT $\alpha$ ), were grown over 990 generations. Of these, four strains were grown exclusively asexually (two of MATa, two of MAT $\alpha$ ), while the eight others (four of MATa, four of MAT $\alpha$ ) were mixed for mating events every 90 generations, resulting in four sexual strains. Paired-end Illumina reads were generated for each of the 12 different strains every 90 generations during 990 generations (for a total of 11 sequencing events per strain). Read numbers per sample ranged from 12,775 to 10,270,312, averaging 2,964,869 reads per sample, with a total of 818,303,966 reads. Details of the read data can be found at BioProject PRJNA308843 and in the original study (McDonald et al., 2016).

### Data processing

The genome of the haploid W303 *S. cerevisiae* strain was retrieved from (Lang et al., 2013). All Illumina paired-end raw reads of the 12 replicate strains generated in (McDonald et al., 2016) were downloaded from the SRA (BioProject identifier PRJNA308843). Raw reads were quality filtered by first removing adapter sequences (with the script used in the original study (McDonald et al., 2016), provided by Daniel P Rice, Harvard University), followed by removing the first 10 bases and quality trimming using trimmomatic v0.33 (Bolger et al., 2014) with parameters set to LEADING:3 TRAILING:3 HEADCROP:10 SLIDINGWINDOW:4:15 MINLEN:36. Additionally, non-overlapping paired-reads were constructed *in silico* from the subset of the original paired-reads that were overlapping, as a prerequisite to run the insertion detection pipeline. For this, overlapping reads (on average overlapping by 16 bp) were merged



using PEAR v0.9.6 with standard parameters (Zhang et al., 2014). Merged reads were split in  
215 half and 20 bp deleted from each read at the overlapping ends using the fastx\_toolkit v 0.0.13.2  
(Hannon Laboratory, 2010). This resulted in mean read lengths of 72 bp. These ‘artificial’  
non-overlapping read pairs were afterwards merged with the read set fraction that was  
non-overlapping.

## 220 Overall transposable element load

A *S. cerevisiae* specific, curated and updated TE library that contained all consensus sequences  
of all TE families found in this species is available from (Carr et al., 2012). With this library, we  
identified TE content and specific copy insertions in the W303 genome using RepeatMasker  
v4.02 (Smit et al., 2013-2015) with parameters set to -nolow -gccalc -s -cutoff 200 -no\_is -nolow  
225 -norna -gff -u -engine rmbblast. For overall TE load estimates, the fraction of reads mapped to  
TEs out of total mappable reads was calculated. For that, the TE library was appended to the  
masked W303 genome and all reads for all strains and generations were mapped using BWA  
v0.7.13 with standard parameters (Li, 2013). For all strains, mean per-base coverage was  
checked with bedtools genomecov v2.26 (Quinlan and Hall, 2010), upon which the asexual strain  
230 3D-90 was excluded from all further analyses, as coverage was lower than one-fold for this  
sample. Following, stat-reads from the PopoolationTE2 v1.10.04 program (Kofler et al., 2016)  
was utilized to extract the number of total mapped reads and reads mapped to TEs.

## Specific transposable element insertions

235 To detect specific reference (present in the reference genome) and non-reference TE insertions in  
all samples, the McClintock pipeline was utilized (Nelson et al., 2017). This pipeline combines  
six different, benchmarked programs in a standardized fashion. McClintock was run with the  
non-overlapping read set, the curated TE library, and the W303 assembly using default  
parameters. The nonredundant insertions output file per sub-program was collected. Next, we  
240 utilized a custom python script to collect all information on insertions detected by all different  
programs and counted insertions with evidence from different programs only once.

To identify full-length TEs and solo LTR insertions, we tagged insertions by length according to the typical *TY* TE properties found in *S. cerevisiae* (i.e. a full TE is a combination of internal sequence and two LTRs within a 500 bp range; solo LTRs are between 220 and 420 bp; see **table S1**). Because TE insertion detection was influenced by coverage, it had to be taken into account for calculating the number of insertions, by adding coverage as random factor (coverage effect  $P < 0.001$ , generation effect  $P = 0.006$ , reproductive mode effect  $P = 0.033$ , and interaction between generation and mode  $P < 0.001$ ; permutation ANOVA). We then calculated the number of lost TEs in asexual strains from the regression slope in asexuals after correcting for coverage (residuals) over 1000 generations, assuming 50 full-length TEs in the ancestor. To additionally check for a bias due to coverage differences between sexual and asexual strains, we randomly subsampled read data for each sample corresponding to the mean coverage of the asexual strains for each generation.

## 255 Modelling

To model TE dynamics in yeast we adjusted an individual based, forward in time simulator by Dolgin and Charlesworth (Dolgin and Charlesworth, 2006). We extended the model to include sexual cycles via fusion of two haploid individuals and recombination, with on average one cross-over on each of the 16 modeled chromosomes (yeast has 16 chromosomes; Goffeau et al., 1996; McDonald et al., 2016). Each chromosome carries 200 loci that are potential targets for a TE insertion. A simulation is initiated with a single individual with 50 TEs randomly placed in the 3200 loci of the genome. The founder individual then populates clonally the whole simulated deme of 100,000 individuals. To account for mutations during this phase we ran 20 burn-in generations of transposition and excision cycles on every individual separately without applying selection. One generation in the simulation consists of a round of selection and reproduction where transposition happens during reproduction, followed by excision. The relative fitness  $w_n$  of an individual carrying  $n$  TEs was modeled as  $w_n = \exp(-an - \frac{1}{2}bn^2)$ , where  $a$  and  $b$  are parameters modeling the strength of selection and the strength of epistatic interactions between TEs respectively (Dolgin and Charlesworth, 2006). The simulation was then continued for 990

270 generations. We performed 10 replicates of each simulation. Using average TE load in the  
population calculated every ten generations, we fit a linear model to estimate average TE loss  
across the ten replicates of each simulation. Parameters were derived from yeast experimental  
measurements and simulations were run with perturbation in the surrounding parametric space  
(see **Table S2**). We further explored the effects of different transposition rates during meiosis vs  
275 asexual reproduction, but this did not change the dynamics even for meiotic transposition rates  
that were not biologically relevant (up to 0.1, i.e. 10% of TEs have transposed during meiosis).  
The last extension included the introduction of an unliked, general modifier allele increasing the  
excision rates. The parameters related to this extension are the initial frequency of the modifier  
allele and the excision rate increases when the modifier allele is present (see **Table S3**). See the  
280 code documentation for details.

## References:

- 285 Agren JA, Wright SI. 2011. Co-evolution between transposable elements and their hosts: a major  
factor in genome size evolution? *Chromosome Res* **19**:777–786.
- Arhipova IR, Meselson M. 2005. Deleterious transposable elements and the extinction of  
asexuals. *Bioessays* 76–85.
- Blanc VM, Adams J. 2004. Ty1 insertions in intergenic regions of the genome of *Saccharomyces  
cerevisiae* transcribed by RNA polymerase III have no detectable selective effect. *FEMS  
290 Yeast Res* **4**:487–491.
- Bolger AM, Lohse M, Usadel B. 2014. Trimmomatic: a flexible trimmer for Illumina sequence  
data. *Bioinformatics* **30**:2114–2120.
- Carr M, Bensasson D, Bergman CM. 2012. Evolutionary genomics of transposable elements in  
*Saccharomyces cerevisiae*. *PLoS One* **7**:e50978.
- 295 Castanera R, López-Varas L, Borgognone A, LaButti K, Lapidus A, Schmutz J, Grimwood J,  
Pérez G, Pisabarro AG, Grigoriev IV, Stajich JE, Ramírez L. 2016. Transposable elements  
versus the fungal genome: Impact on whole-genome architecture and transcriptional  
profiles. *PLoS Genet* **12**:e1006108.
- Charlesworth B, Langley CH. 1986. The evolution of self-regulated transposition of transposable  
300 elements. *Genetics* **112**:359–383.
- Crespi B, Schwander T. 2012. Asexual evolution: do intragenomic parasites maintain sex? *Mol  
Ecol* **21**:3893–3895.
- Dolgin ES, Charlesworth B. 2006. The fate of transposable elements in asexual populations.  
*Genetics* **174**:817–827.
- 305 Doolittle WF, Sapienza C. 1980. Selfish genes, the phenotype paradigm and genome evolution.  
*Nature* **284**:601–603.

- Finnegan DJ. 1992. Transposable elements. *Curr Opin Genet Dev* **2**:861–867.
- Garfinkel DJ, Nyswaner KM, Stefanisko KM, Chang C, Moore SP. 2005. Ty1 copy number dynamics in *Saccharomyces*. *Genetics* **169**:1845–1857.
- 310 Goffeau A, Barrell BG, Bussey H, Davis RW, Dujon B, Feldmann H, Galibert F, Hoheisel JD, Jacq C, Johnston M, Louis EJ, Mewes HW, Murakami Y, Philippsen P, Tettelin H, Oliver SG. 1996. Life with 6000 genes. *Science* **274**:546, 563–7.
- Hannon Laboratory. 2010. FASTX-Toolkit. [http://hannonlab.cshl.edu/fastx\\_toolkit/index.html](http://hannonlab.cshl.edu/fastx_toolkit/index.html)
- Hickey DA. 1982. Selfish DNA: a sexually-transmitted nuclear parasite. *Genetics* **101**:519–531.
- 315 Hua-Van A, Le Rouzic A, Boutin TS, Filée J, Capy P. 2011. The struggle for life of the genome's selfish architects. *Biol Direct* **6**:19.
- Kofler R, Gómez-Sánchez D, Schlötterer C. 2016. PoPoolationTE2: Comparative population genomics of transposable elements using pool-seq. *Mol Biol Evol* **33**:2759–2764.
- Lang GI, Rice DP, Hickman MJ, Sodergren E, Weinstock GM, Botstein D, Desai MM. 2013. Pervasive genetic hitchhiking and clonal interference in forty evolving yeast populations. *Nature* **500**:571–574.
- 320 Li H. 2013. Aligning sequence reads, clone sequences and assembly contigs with BWA-MEM. *arXiv [q-bioGN]*.
- McDonald MJ, Rice DP, Desai MM. 2016. Sex speeds adaptation by altering the dynamics of molecular evolution. *Nature* **531**:233–236.
- 325 Montgomery EA, Huang SM, Langley CH, Judd BH. 1991. Chromosome rearrangement by ectopic recombination in *Drosophila melanogaster*: genome structure and evolution. *Genetics* **129**:1085–1098.
- Nelson MG, Linheiro RS, Bergman CM. 2017. McClintock: An integrated pipeline for detecting transposable element insertions in whole-genome shotgun sequencing data. *G3* **7**:2763–2778.
- 330 Nuzhdin SV, Petrov DA. 2003. Transposable elements in clonal lineages: lethal hangover from sex. *Biol J Linn Soc Lond* **79**:33–41.
- Orgel LE, Crick FH. 1980. Selfish DNA: the ultimate parasite. *Nature* **284**:604–607.
- 335 Quinlan AR, Hall IM. 2010. BEDTools: a flexible suite of utilities for comparing genomic features. *Bioinformatics* **26**:841–842.
- Smit A, Hubley R, Green P. 2013–2015. RepeatMasker Open-4.0.
- Voytas DF, Boeke JD. 1992. Yeast retrotransposon revealed. *Nature* **358**:717.
- Wright S, Finnegan D. 2001. Genome evolution: Sex and the transposable element. *Curr Biol* **11**:R296–R299.
- 340 Zeyl C, Bell G, Green DM. 1996. Sex and the spread of retrotransposon Ty3 in experimental populations of *Saccharomyces cerevisiae*. *Genetics*.
- Zhang J, Kobert K, Flouri T, Stamatakis A. 2014. PEAR: a fast and accurate Illumina Paired-End reAd mergeR. *Bioinformatics* **30**:614–620.

345

## Acknowledgments

We thank Michael J McDonald, Daniel P Rice and Michael M Desai for providing the experimental evolution raw data and for helpful explanations. We further thank Patrick Tran Van

for setting up the insertion pipeline, Daniel L Jeffries for providing the TE wrapper script,  
350 Beatriz Navarro Dominguez for improving the empirical analyses R script and Laurent Keller for  
discussions and comments on the manuscript. This study was supported by a DFG research  
fellowships (grant numbers BA 5800/1-1 and BA 5800/2-1 to J.B.) and by funding from the  
University of Lausanne and Swiss SNF (grant numbers PP00P3\_170627 and PP00P3\_139013 to  
T.S.).

355 **Author contributions**

J.B. and T.S. conceived the study, J.B. and D.S. performed empirical data analyses, K.S.J. and  
D.R performed modeling, J.B. and T.S. wrote the paper with input from all authors.

**Competing interests**

Authors declare no competing interests.

360 **Data availability**

Raw read data of the experiment is available at SRA (BioProject identifier PRJNA308843).

**Code availability**

The code used for both the analyses of empirical data and for the theoretical prediction of TE  
dynamics together with explanations are available online at  
365 [https://github.com/KamilSJaron/reproductive\\_mode\\_TE\\_dynamics](https://github.com/KamilSJaron/reproductive_mode_TE_dynamics)

370

## Supplementary information

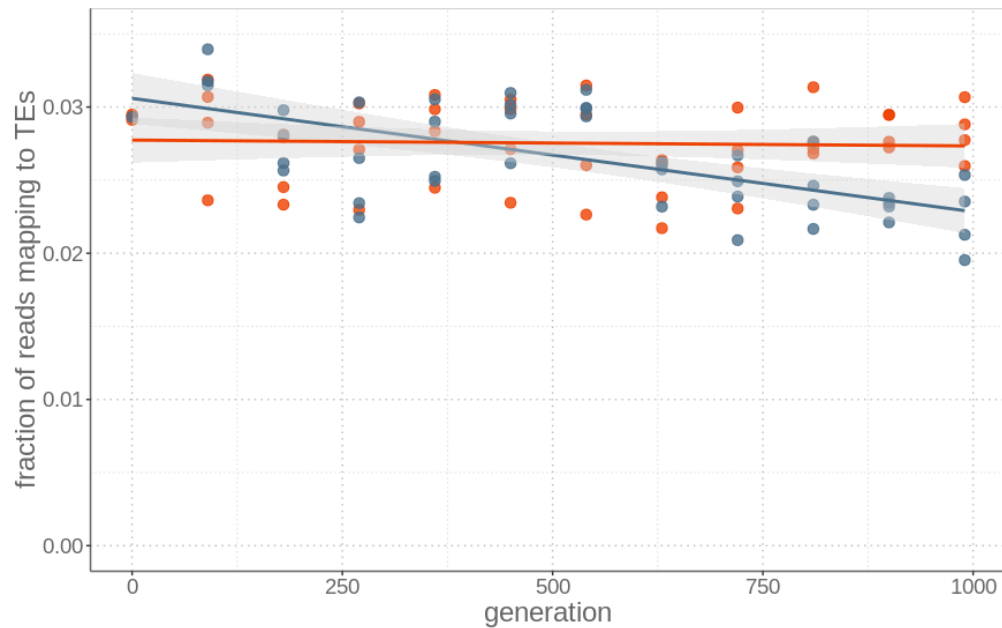

375 **Fig. S1.** Transposable element load remains stable in sexual strains, but is reduced in asexual  
strains after 1000 generations. Read fraction mapping to TEs relative to the sum of reads  
mapping to the genome and/or the TE library for each of the four replicate sexual (red) and  
asexual (blue) strains sequenced every 90 generations (from generation 0 to 990). Lines represent  
LR and the grey areas represent 95% CI.

380

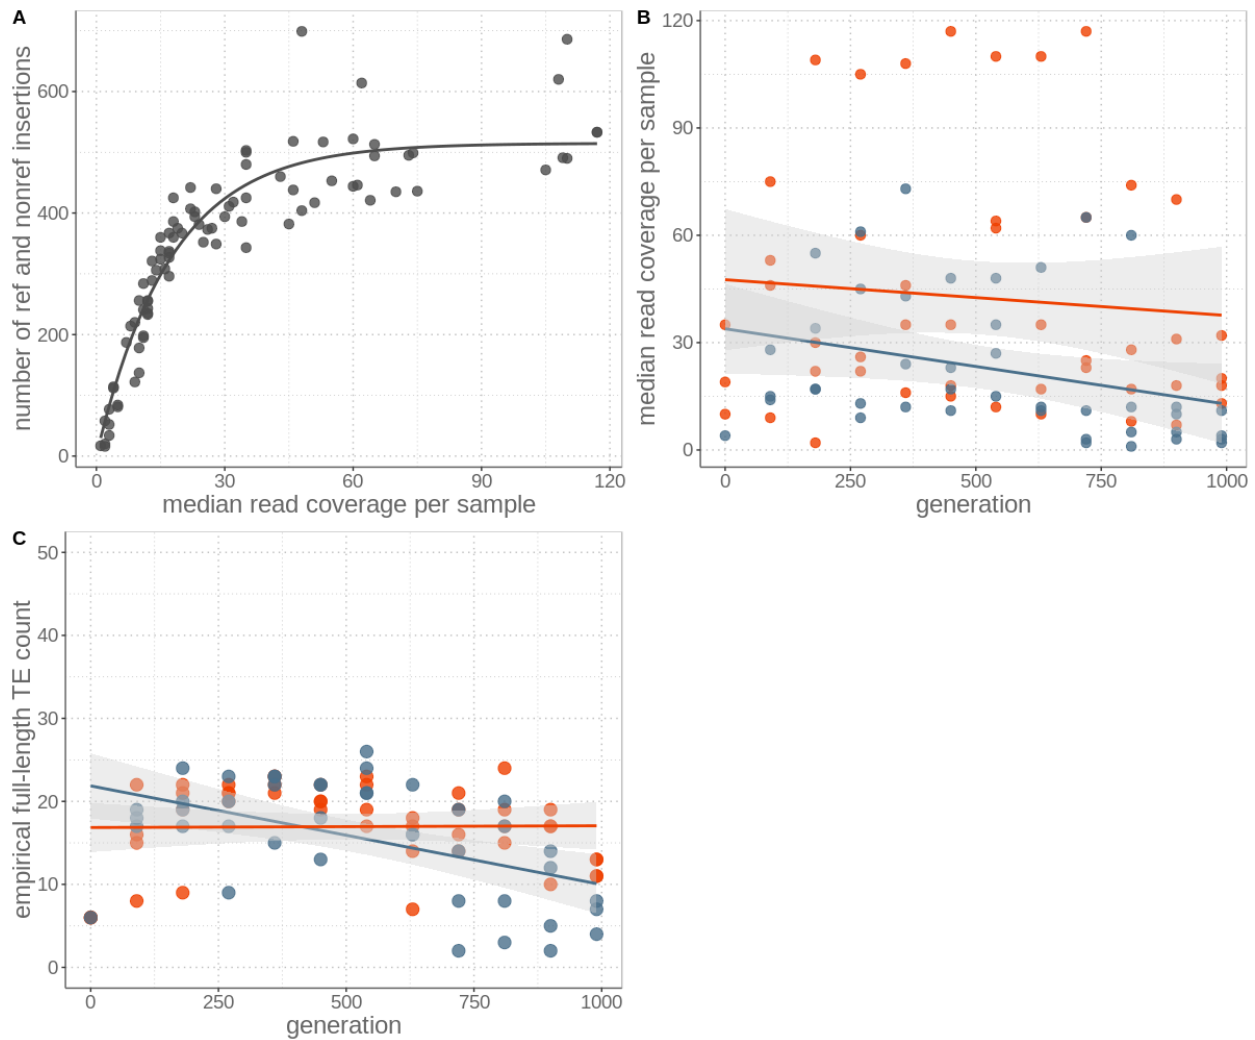

**Fig. S2.** Identification of TE insertions depends on the sequencing coverage. (A) TE insertions (including those present in the reference genome and *de novo* insertions) vs. median sequencing coverage from paired reads. Coverage influences the ability to detect TE insertions (Wilcoxon signed-rank test  $V = 4095$ ,  $p$ -value  $< 0.001$ ). (B) Median read coverage per sample for sexual (red) and asexual (blue) strains over 1000 generations. Data from asexual strains had lower coverage, but were not different to sexuals through time (generation effect  $P = 0.096$ , reproductive mode effect  $P = 0.002$ , and interaction between generation and mode  $P = 0.588$ ; permutation ANOVA). Lines represent LR and the grey areas represent 95% CI. (C) Subsampling to the mean asexual read coverage per generation for all samples results in similar findings (generation effect  $P = 0.012$ , reproductive mode effect  $P = 0.302$ , and interaction between generation and mode  $P = 0.004$ ; permutation ANOVA).

395

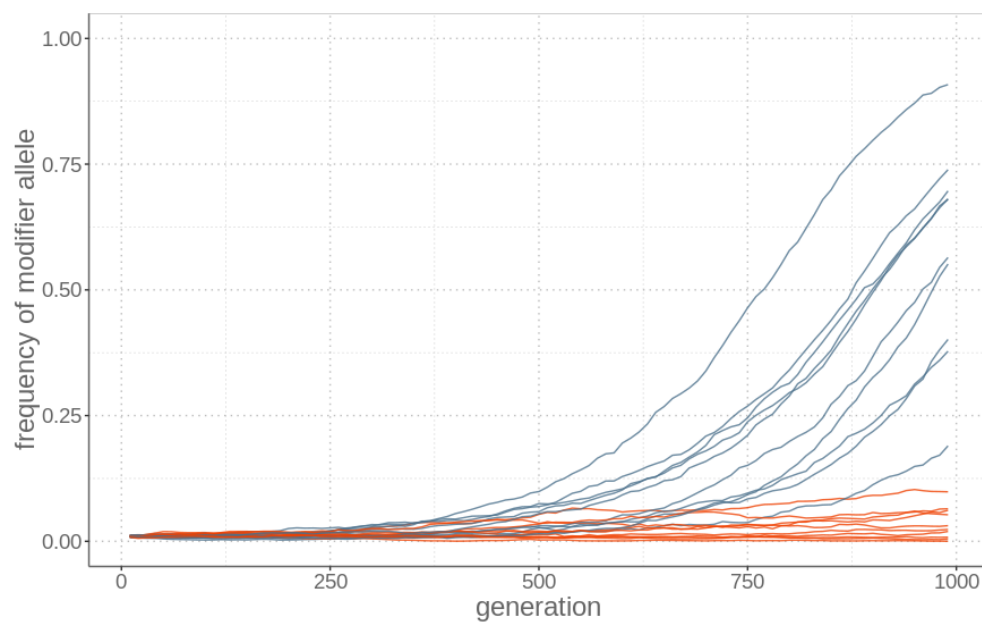

**Fig. S3.** The spread of a modifier of excision rates is faster in asexual than sexual populations because it remains linked to genomes that have few TE copies and therefore a high relative fitness. The modifier allele frequency is shown over time for simulations under sexual (red) and asexual (blue) reproduction, with ten replicates.

400



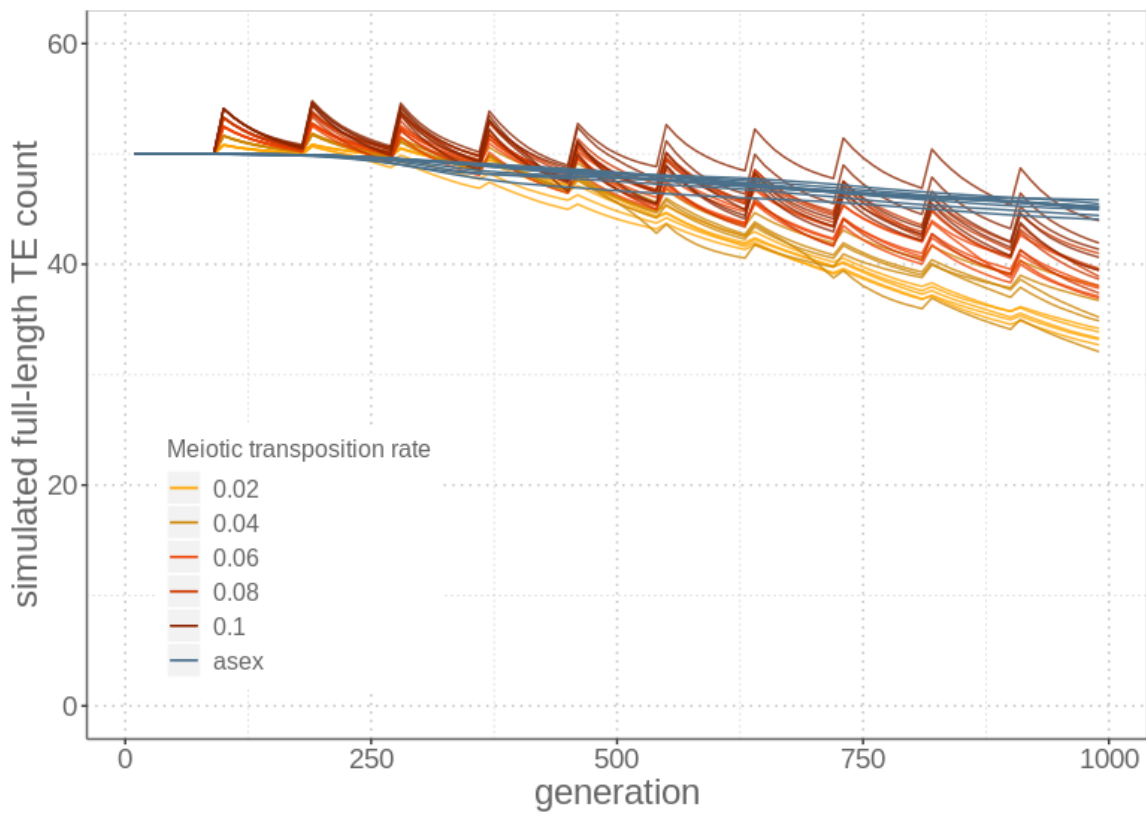

405

**Fig. S4.** Simulations with higher transposition rates during meiosis than mitosis. Meiosis generates the TE load spikes following events of sexual reproduction, but allows for selection to effectively remove genotypes with high TE loads by generating fitness variation among genotypes. Parameters used in the simulations are indicated in Table S2 (bold values).

|     | <b>Element</b> | <b>Internal</b> | <b>LTR</b> | <b>combined</b> | <b>boundaries range</b> |
|-----|----------------|-----------------|------------|-----------------|-------------------------|
| 410 | TY1/Copia      | 5249            | 338        | 5925            | 5425-6425               |
|     | TY2/Copia      | 5295            | 332        | 5958            | 5458-6458               |
|     | TY3/Gypsy      | 4671            | 340        | 5351            | 4851-5851               |
|     | TY3_1p/Gypsy   | 4675            | 365        | 5405            | 4905-5905               |
|     | TY4/Copia      | 5484            | 371        | 6226            | 5726-6726               |
| 415 | TY5/Copia      | 4874            | 251        | 5376            | 4876-5876               |

**Table S1.** *S. cerevisiae* TY elements and the sizes (in bp) of internal regions and LTRs and the size boundaries used for filtering.

| transposition_rate | exision_rate    | selection_a     | selection_b    | sex_lost_TEs | asex_lost_TEs |
|--------------------|-----------------|-----------------|----------------|--------------|---------------|
| 1.00E-06           | 5.00E-07        | 1.00E-04        | 0              | 6.5          | 2             |
| 1.00E-05           | 5.00E-07        | 1.00E-04        | 0              | 6.7          | 1.5           |
| 1.00E-04           | 5.00E-07        | 1.00E-04        | 0              | 3.5          | -0.8          |
| 1.00E-06           | 1.00E-06        | 1.00E-04        | 0              | 8.1          | 2.2           |
| 1.00E-05           | 1.00E-06        | 1.00E-04        | 0              | 7.8          | 2.3           |
| 1.00E-04           | 1.00E-06        | 1.00E-04        | 0              | 5.7          | -0.1          |
| 1.00E-06           | 5.00E-05        | 1.00E-04        | 0              | 28.6         | 17            |
| 1.00E-05           | 5.00E-05        | 1.00E-04        | 0              | 21.9         | 13.1          |
| 1.00E-04           | 5.00E-05        | 1.00E-04        | 0              | 19.4         | 11            |
| 1.00E-06           | 5.00E-07        | 5.10E-04        | 0              | 6.7          | 1.9           |
| 1.00E-05           | 5.00E-07        | 5.10E-04        | 0              | 6.4          | 1.6           |
| 1.00E-04           | 5.00E-07        | 5.10E-04        | 0              | 4.3          | -0.2          |
| 1.00E-06           | 1.00E-06        | 5.10E-04        | 0              | 9.1          | 2.5           |
| 1.00E-05           | 1.00E-06        | 5.10E-04        | 0              | 8.2          | 2.4           |
| 1.00E-04           | 1.00E-06        | 5.10E-04        | 0              | 6.3          | 0.5           |
| 1.00E-06           | 5.00E-05        | 5.10E-04        | 0              | 22.7         | 14            |
| 1.00E-05           | 5.00E-05        | 5.10E-04        | 0              | 22.6         | 13.6          |
| 1.00E-04           | 5.00E-05        | 5.10E-04        | 0              | 20.6         | 11.3          |
| 1.00E-06           | 5.00E-07        | 1.00E-04        | 0.00039        | 6.5          | 2             |
| 1.00E-05           | 5.00E-07        | 1.00E-04        | 0.00039        | 6.7          | 1.5           |
| 1.00E-04           | 5.00E-07        | 1.00E-04        | 0.00039        | 3.5          | -0.8          |
| 1.00E-06           | 1.00E-06        | 1.00E-04        | 0.00039        | 8.1          | 2.2           |
| 1.00E-05           | 1.00E-06        | 1.00E-04        | 0.00039        | 7.8          | 2.3           |
| 1.00E-04           | 1.00E-06        | 1.00E-04        | 0.00039        | 5.7          | -0.1          |
| 1.00E-06           | 5.00E-05        | 1.00E-04        | 0.00039        | 28.6         | 17            |
| 1.00E-05           | 5.00E-05        | 1.00E-04        | 0.00039        | 21.9         | 13.1          |
| 1.00E-04           | 5.00E-05        | 1.00E-04        | 0.00039        | 19.4         | 11            |
| 1.00E-06           | 5.00E-07        | 5.10E-04        | 0.00039        | 6.7          | 1.9           |
| 1.00E-05           | 5.00E-07        | 5.10E-04        | 0.00039        | 6.4          | 1.6           |
| 1.00E-04           | 5.00E-07        | 5.10E-04        | 0.00039        | 4.3          | -0.2          |
| <b>1.00E-06</b>    | <b>1.00E-06</b> | <b>5.10E-04</b> | <b>0.00039</b> | <b>9.1</b>   | <b>2.5</b>    |
| 1.00E-05           | 1.00E-06        | 5.10E-04        | 0.00039        | 8.2          | 2.4           |
| 1.00E-04           | 1.00E-06        | 5.10E-04        | 0.00039        | 6.3          | 0.5           |
| 1.00E-06           | 5.00E-05        | 5.10E-04        | 0.00039        | 22.7         | 14            |
| 1.00E-05           | 5.00E-05        | 5.10E-04        | 0.00039        | 22.6         | 13.6          |
| 1.00E-04           | 5.00E-05        | 5.10E-04        | 0.00039        | 20.6         | 11.3          |

420 **Table S2.** Explored parameter space of the simulations as pertinent for yeast (empirically determined values in bold). Selection\_a and selection\_b are selection coefficients for linear fitness effects and epistasis, respectively. Lost\_TEs refers to the total number of TE lost after 1000 generations (averaged over ten replicates).

| init_f      | selection_a     | selection_b | sex_lost_TEs | asex_lost_TEs |
|-------------|-----------------|-------------|--------------|---------------|
| 0.01        | 2.00E-04        |             | 0            | 0.6           |
| 0.01        | 3.00E-04        |             | 0            | 0.7           |
| 0.01        | 4.00E-04        |             | 0            | 0.6           |
| <b>0.01</b> | <b>0.000425</b> |             | <b>0</b>     | <b>0.9</b>    |
| <b>0.01</b> | <b>0.00045</b>  |             | <b>0</b>     | <b>0.7</b>    |
| <b>0.01</b> | <b>0.000475</b> |             | <b>0</b>     | <b>0.8</b>    |
| <b>0.01</b> | <b>5.00E-04</b> |             | <b>0</b>     | <b>1</b>      |
| 0.01        | 5.00E-04        | 1.00E-06    |              | 0.3           |
| 0.01        | 1.00E-03        | 1.00E-06    |              | 0.6           |
| 0.01        | 2.00E-03        | 1.00E-06    |              | 1.3           |
| 0.01        | 2.00E-04        | 1.00E-05    |              | 1.3           |
| 0.01        | 3.00E-04        | 1.00E-05    |              | 1.2           |
| 0.01        | 4.00E-04        | 1.00E-05    |              | 2.2           |
| 0.01        | 5.00E-04        | 1.00E-05    |              | 2.2           |
| 0.1         | 2.00E-04        | 0.00E+00    |              | 3.4           |
| 0.1         | 3.00E-04        | 0.00E+00    |              | 4             |
| 0.1         | 4.00E-04        | 0.00E+00    |              | 4.9           |
| 0.1         | 5.00E-04        | 0           |              | 6.4           |
| 0.1         | 2.00E-04        | 1.00E-05    |              | 7.6           |
| 0.1         | 3.00E-04        | 1.00E-05    |              | 8.8           |
| 0.1         | 4.00E-04        | 1.00E-05    |              | 10.6          |
| 0.1         | 5.00E-04        | 1.00E-05    |              | 11.9          |

425 **Table S3.** Explored parameter space for simulations including a modifier allele. Highlighted is the simulation closest to empirical observations. Init\_f is the frequency of the modifier at the start of the simulations. Selection\_a and selection\_b are selection coefficients for linear fitness effects and epistasis, respectively. Lost\_TEs refers to the total number of TE lost after 1000 generations (averaged over ten replicates). The bold lines refer to parameter combinations that generate results close to the observed empirical values.

430
